# Supplementary material for: Assessing rainfall radar errors with an inverse stochastic modelling framework
Source: Copernicus journal article supplement (doi:10.5194/egusphere-2024-26), 2024-01-30

$\rho_P = 0.778, \rho_S = 0.748$

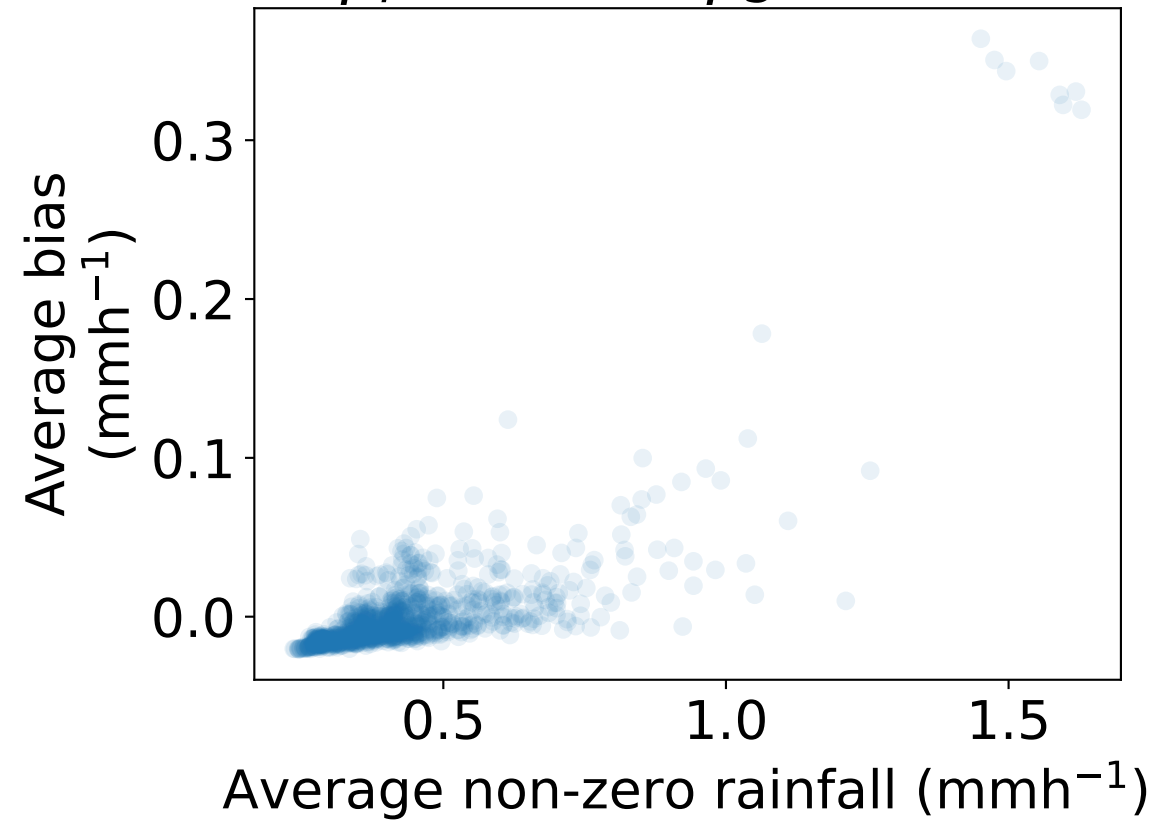

$\rho_P = 0.864, \rho_S = 0.804$

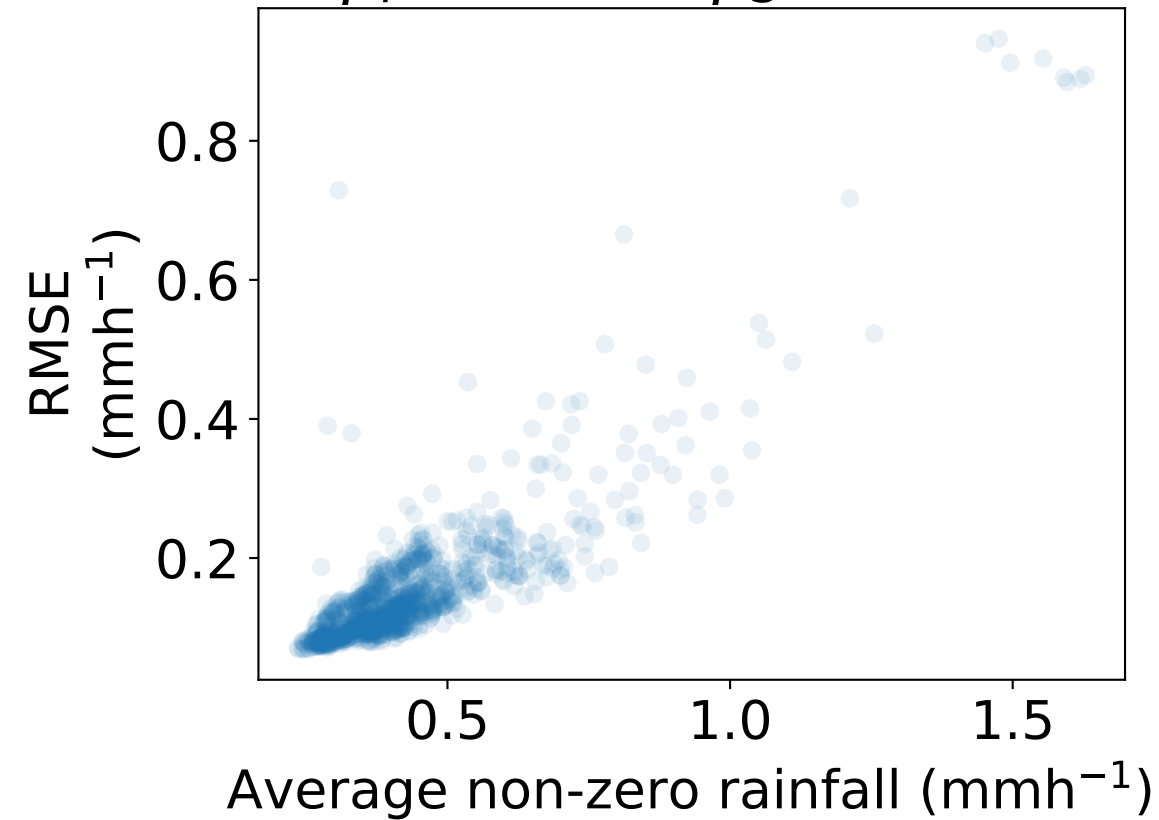

$\rho_P = 0.207, \rho_S = 0.238$

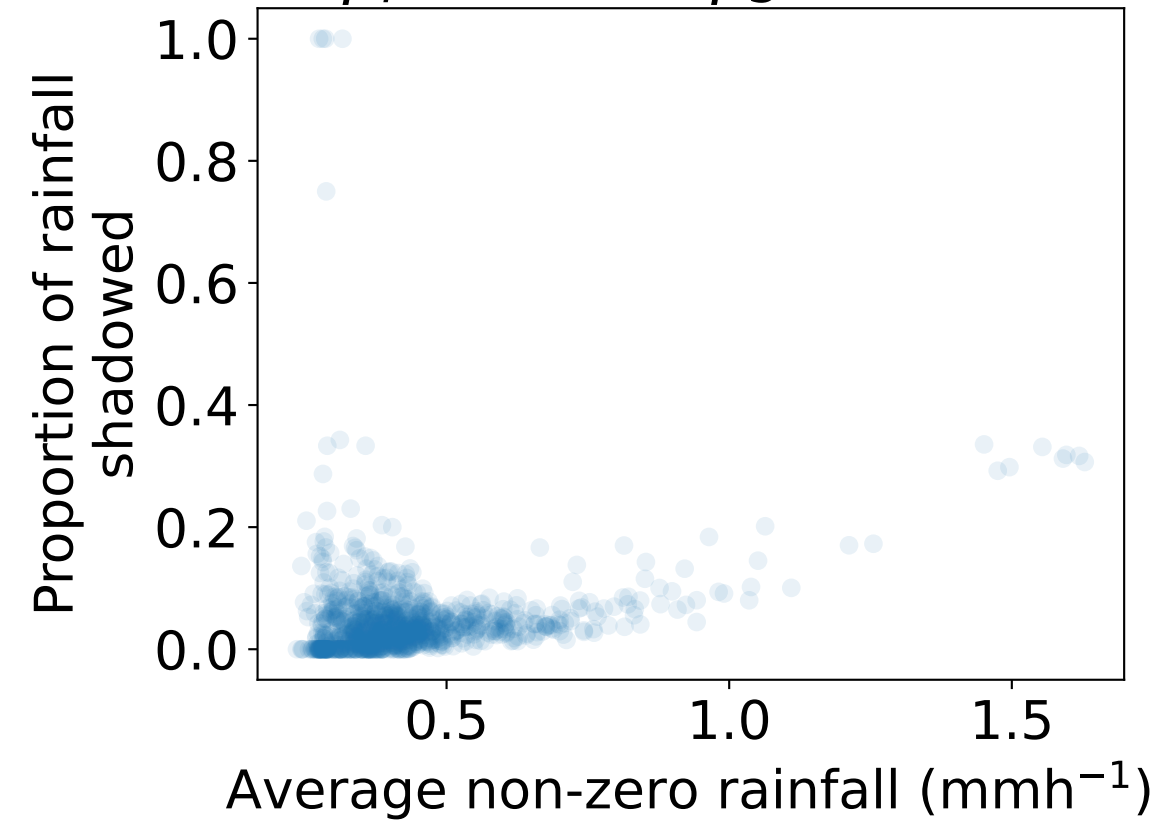

$\rho_P = 0.653, \rho_S = 0.63$

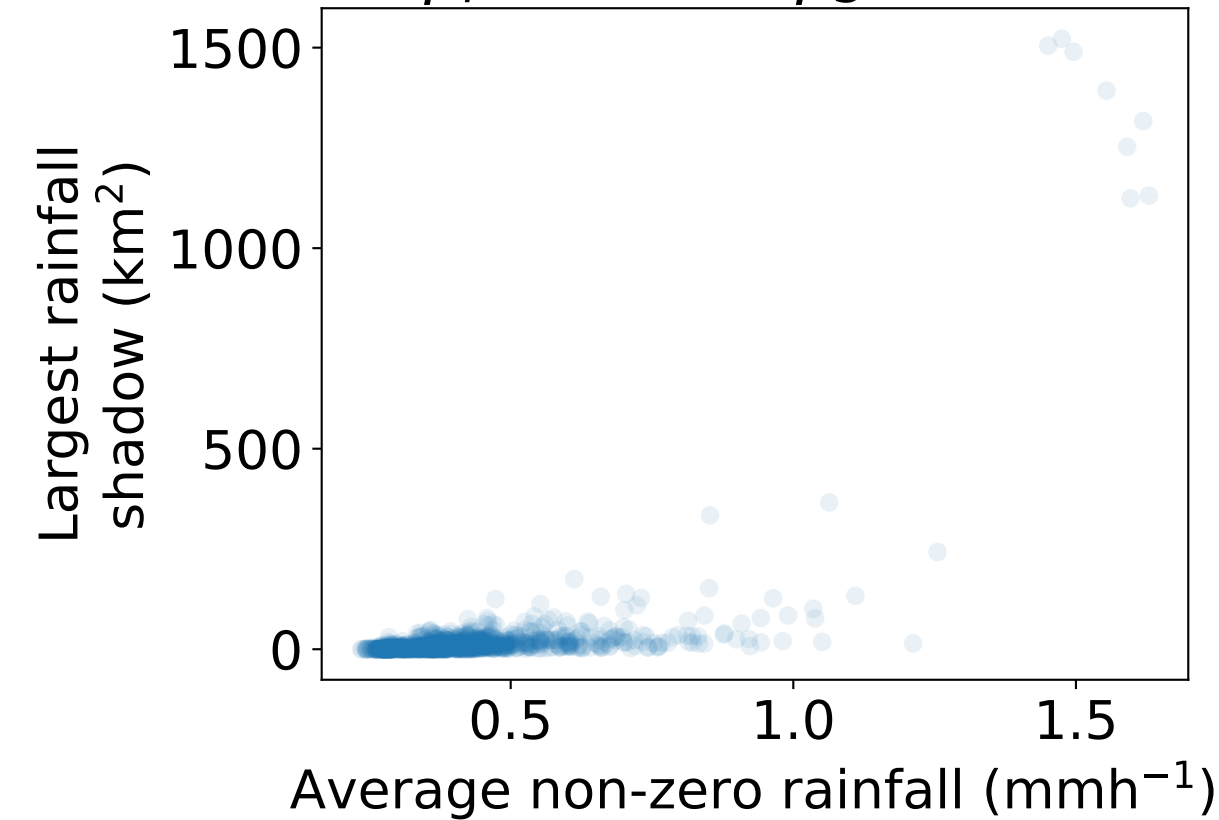

$\rho_P = 0.476, \rho_S = 0.87$

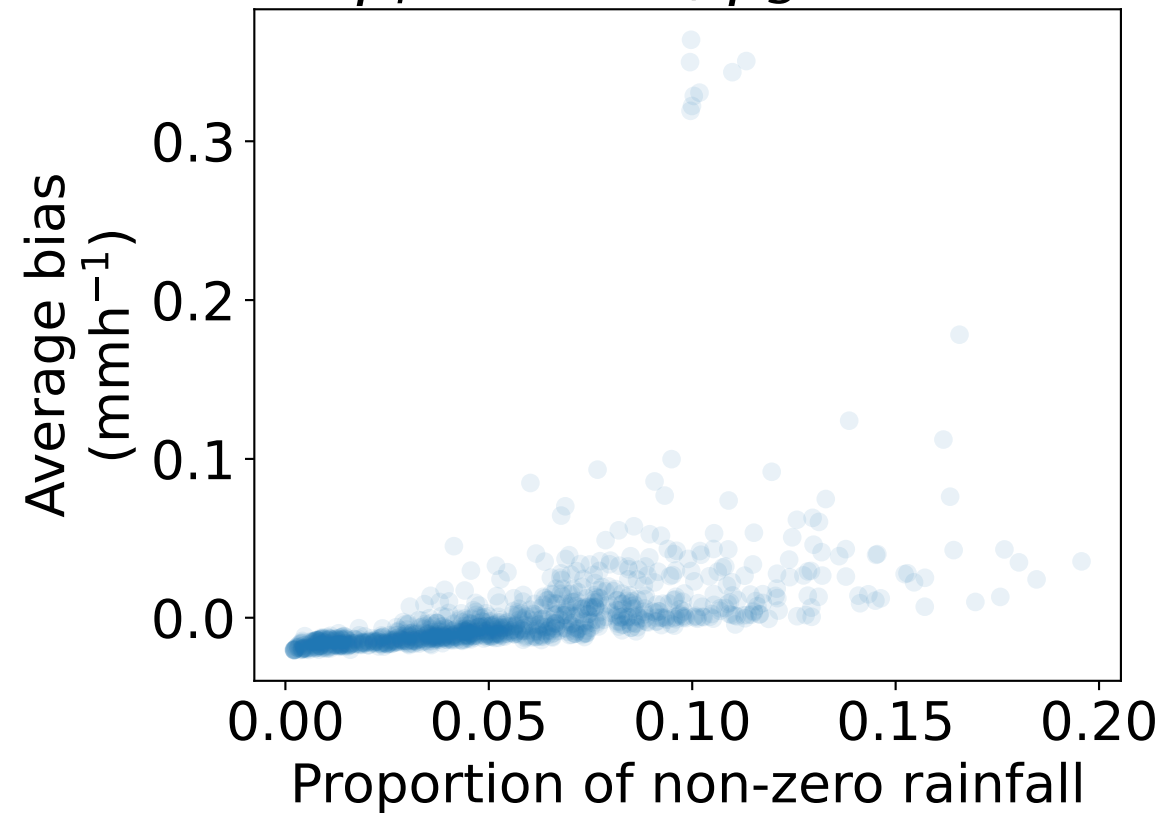

$\rho_P = 0.331, \rho_S = 0.558$

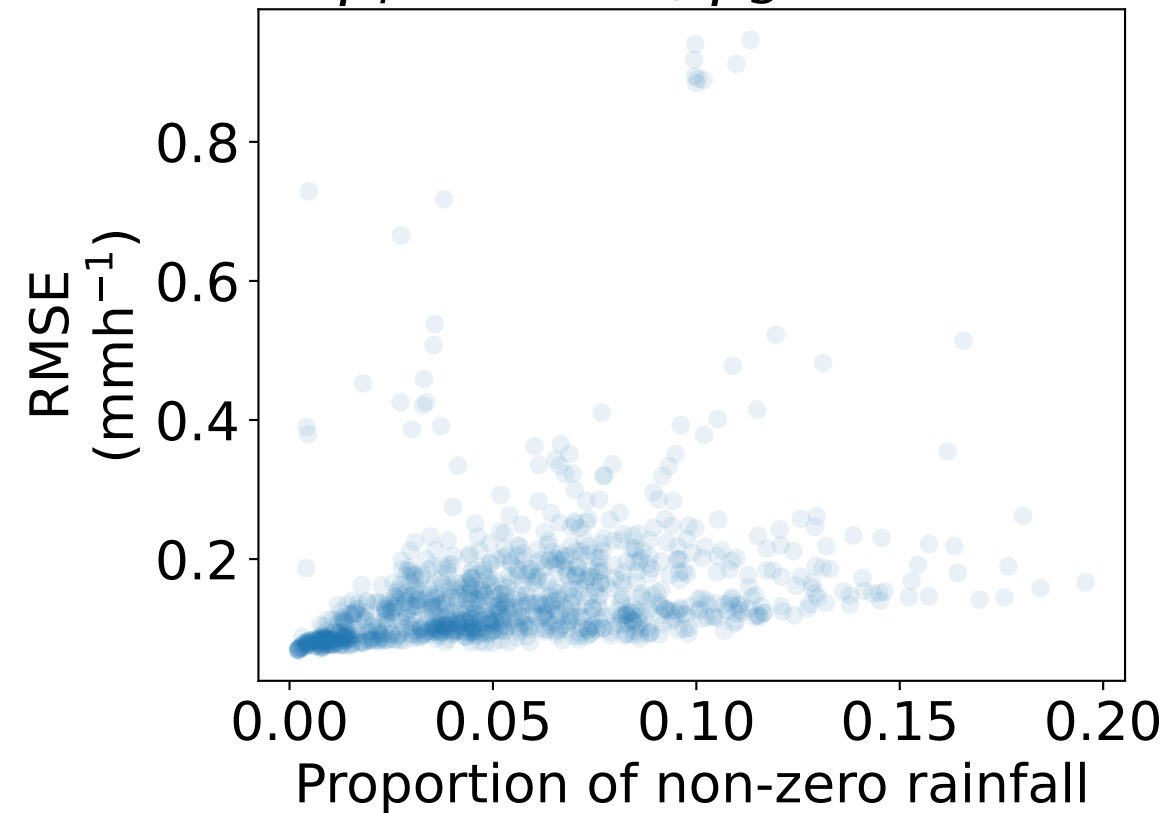

$\rho_P = -0.043, \rho_S = 0.1$

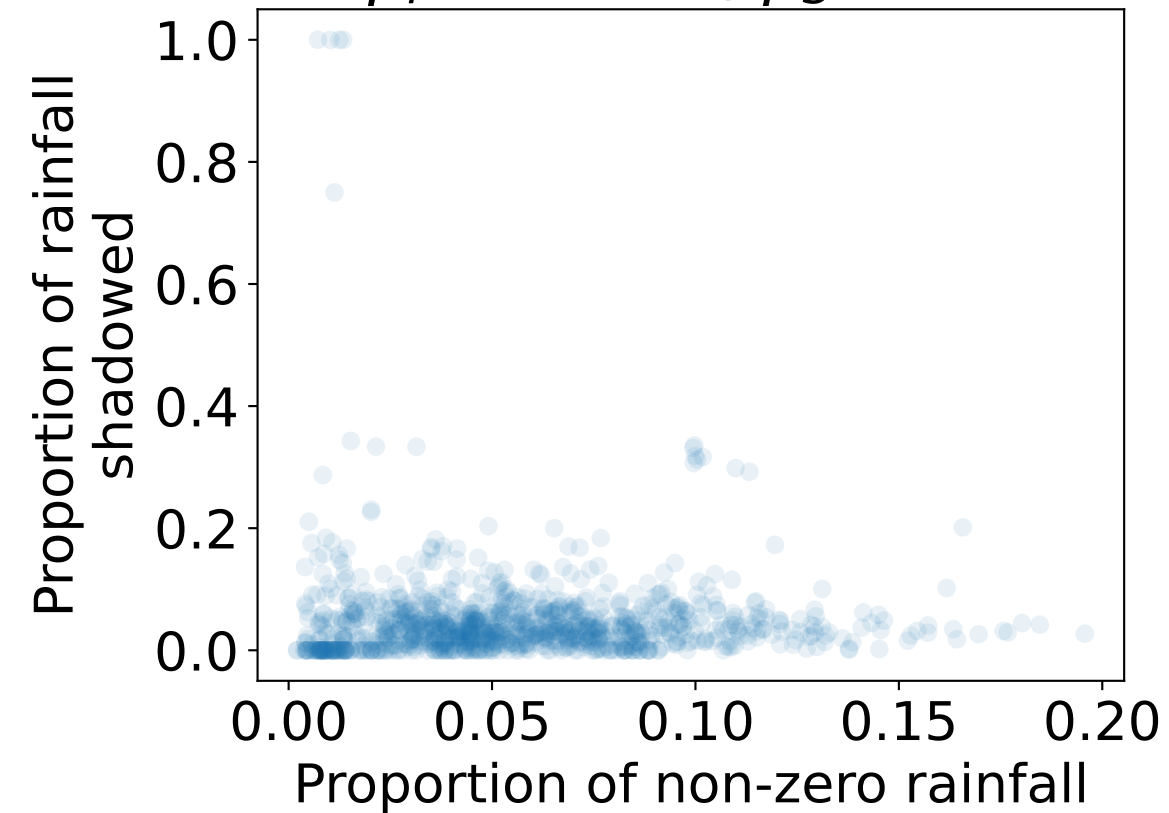

$\rho_P = 0.193, \rho_S = 0.511$

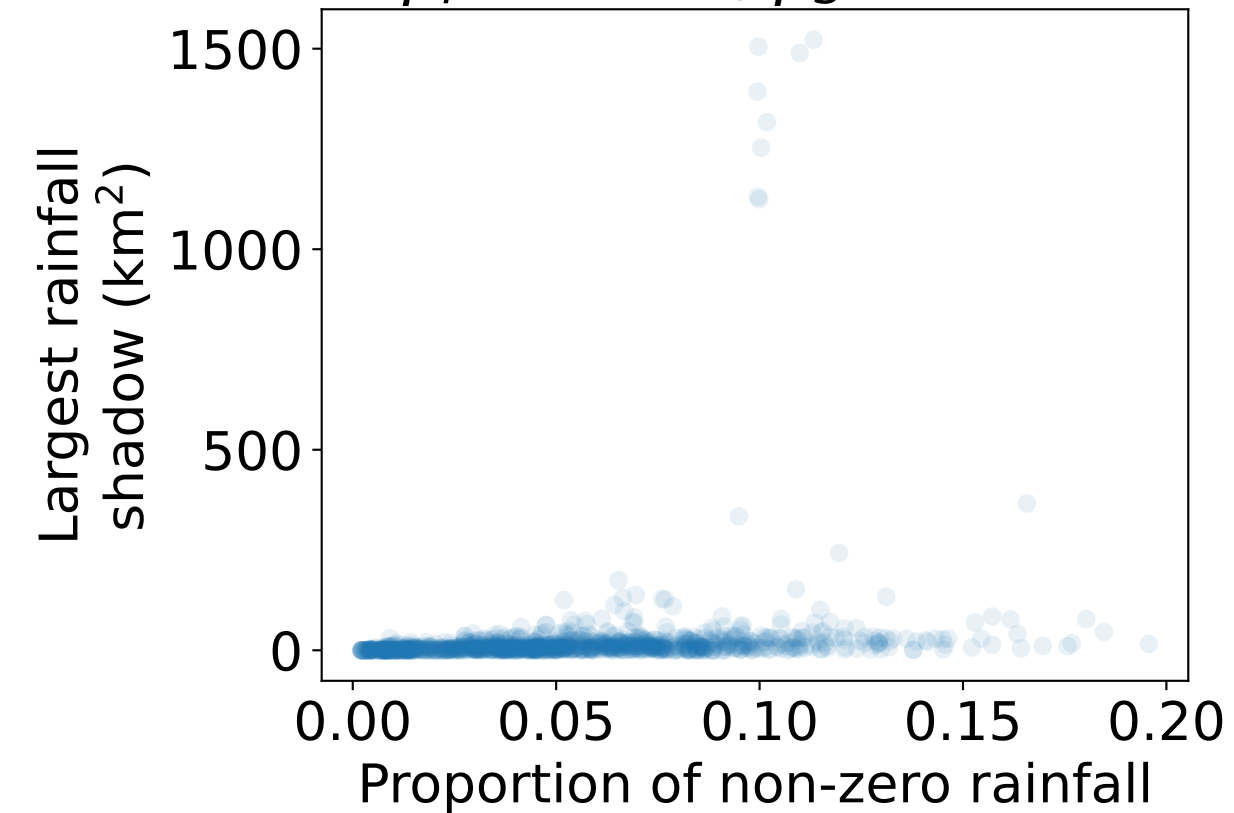

Supplement: Supplementary file [file egusphere-2024-26-AC3-supplement.pdf]
