# Supplementary material for: Assessing rainfall radar errors with an inverse stochastic modelling framework
Source: Copernicus journal article supplement (doi:10.5194/egusphere-2024-26), 2024-01-30

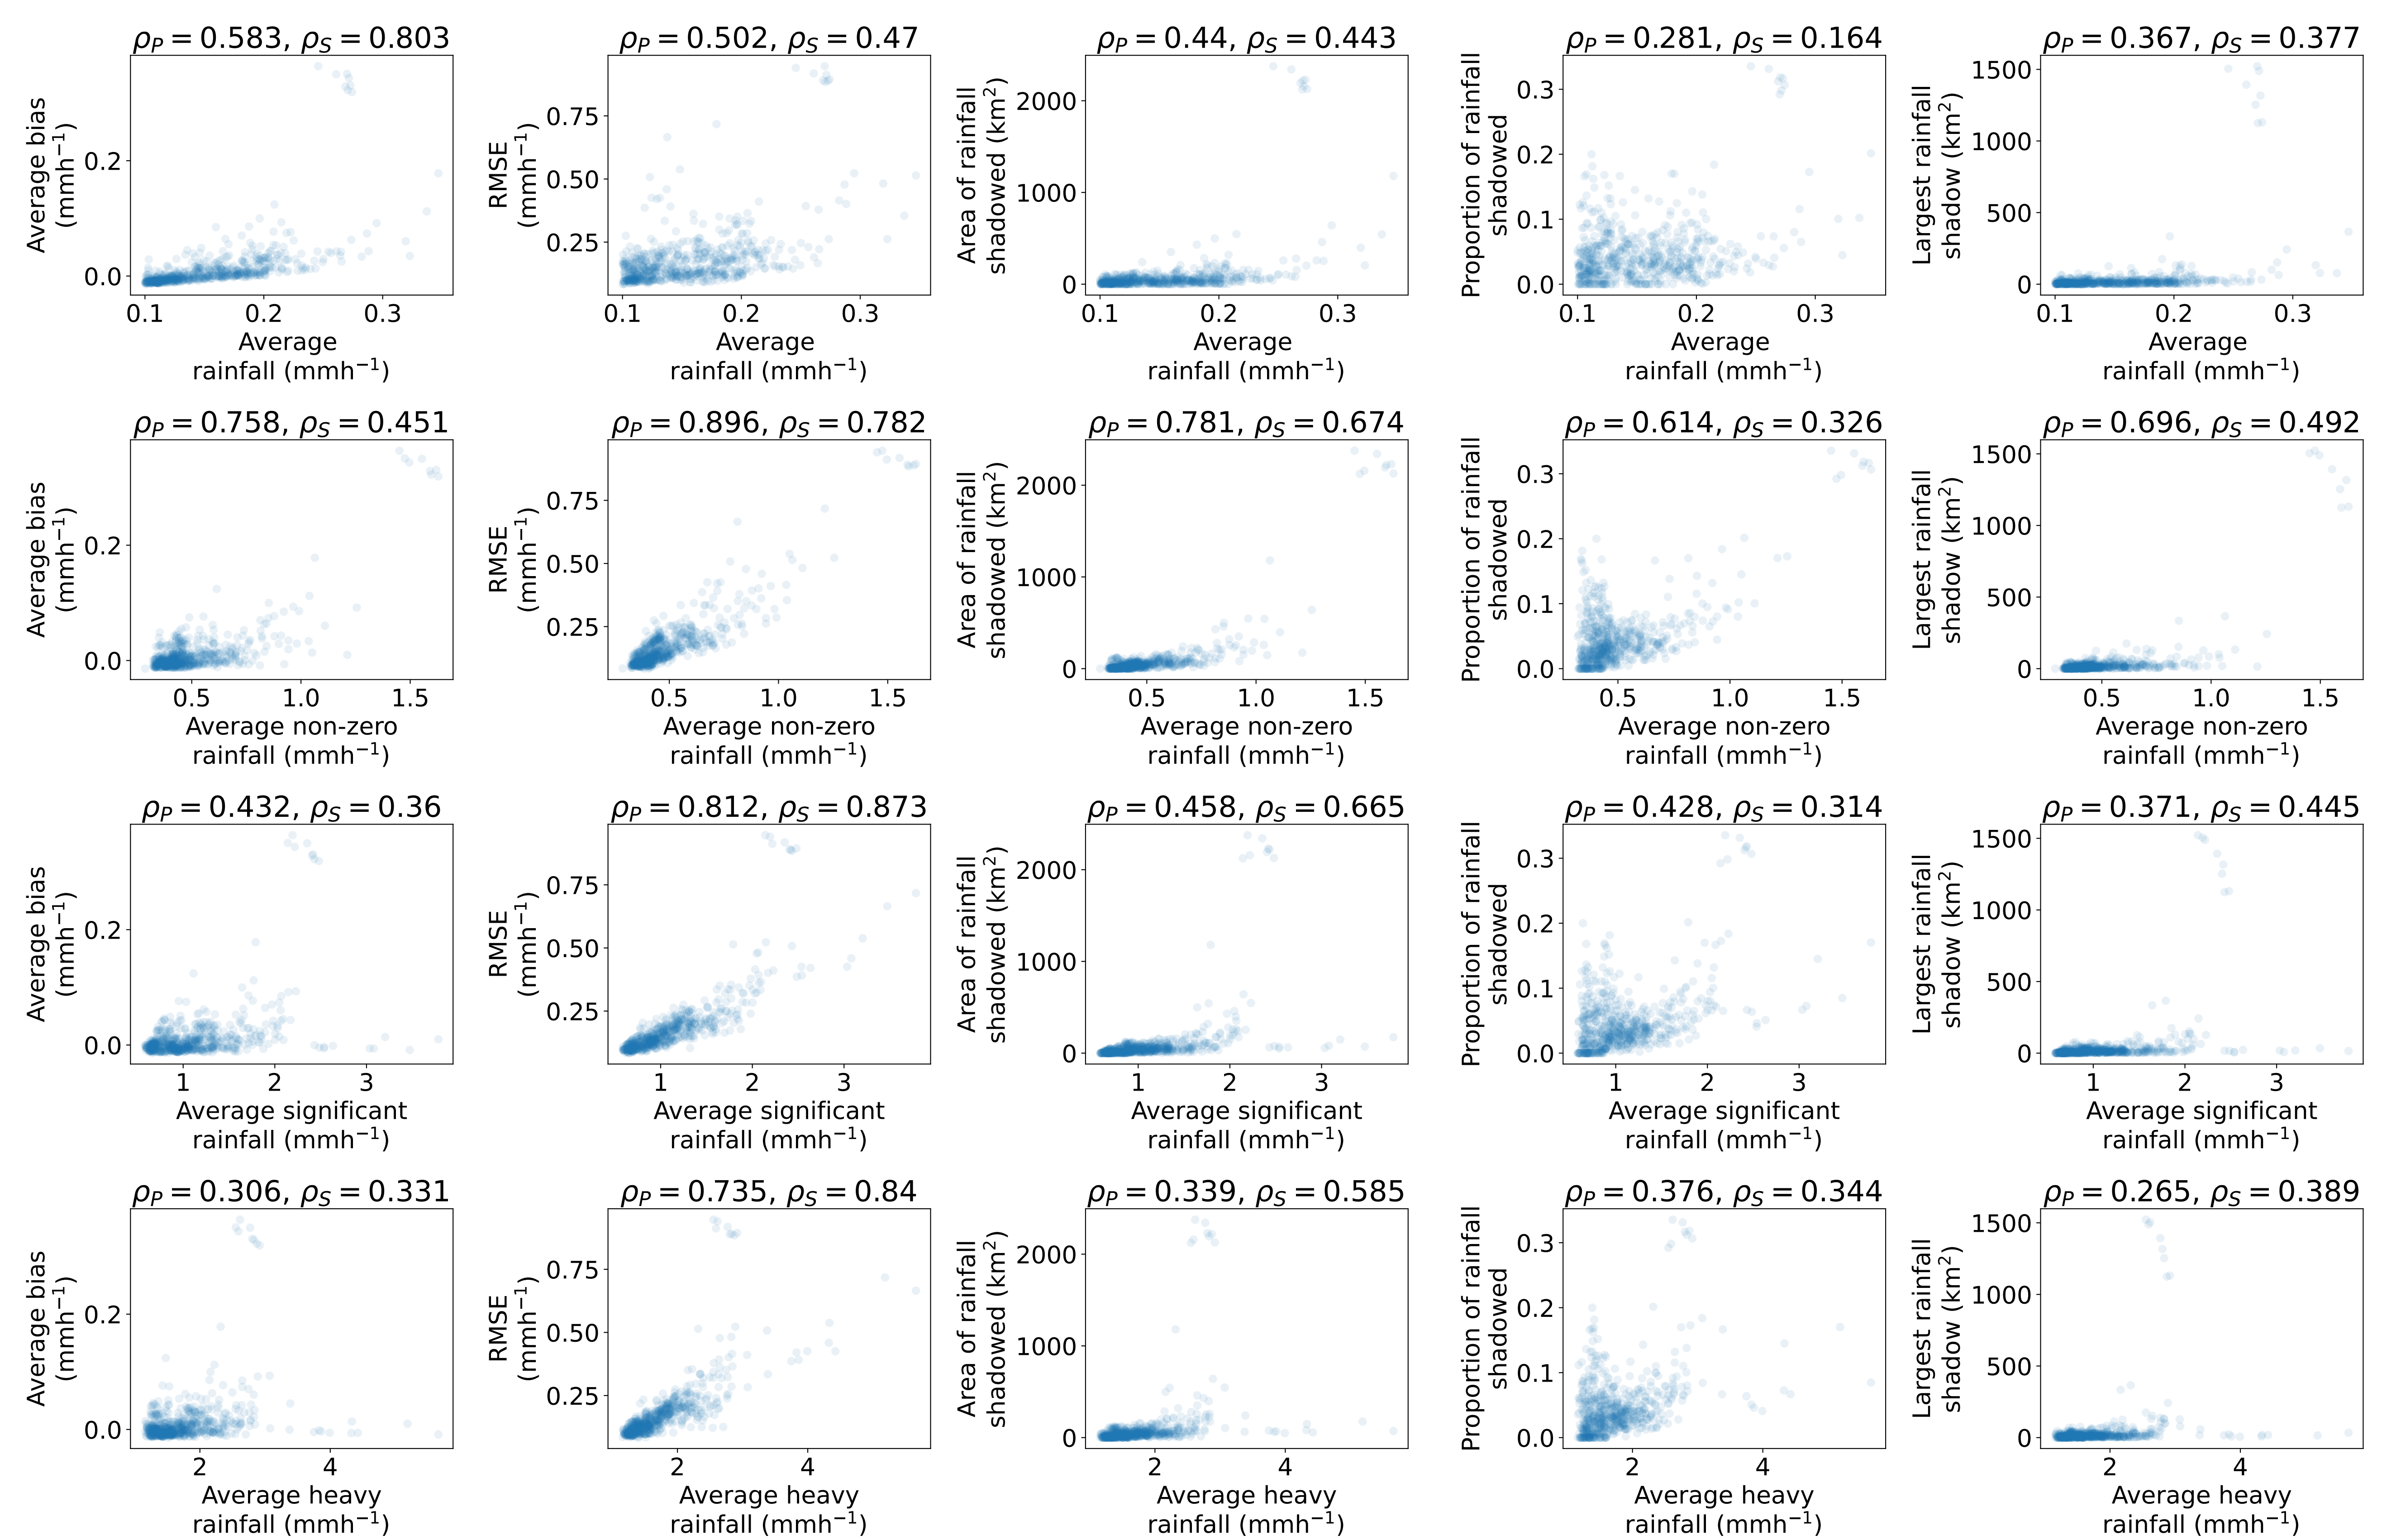

Supplement: Supplementary file [file egusphere-2024-26-AC4-supplement.pdf]
